# Supplementary material for: c-di-GMP inhibits LonA-dependent proteolysis of TfoY in Vibrio cholerae
Source: PubMed Central journal article supplement (PMC7371385; doi:10.1371/journal.pgen.1008897), 2020-06-26
Supplement: pgen.1008897.s005.pdf [file pgen.1008897.s005.pdf]

S1 Table. Proteins enriched in  $\Delta lonA$  relative to WT<sub>a</sub>

| Gene            | Description                                                    | Fold Change (log2) |
|-----------------|----------------------------------------------------------------|--------------------|
| VC1722          | T6SS and motility regulator; TfoY                              | 4.289727879        |
| VC0049          | hypothetical protein                                           | 1.289696121        |
| VCA0422         | hypothetical protein                                           | 0.922209424        |
| VCA1069         | methyl-accepting chemotaxis protein                            | 0.783467412        |
| VCA0540         | formate transporter 1, putative                                | 0.693574789        |
| VCA0349;VCA0504 | relB protein                                                   | 0.688476652        |
| VC0018          | 16 kDa heat shock protein A                                    | 0.66216644         |
| VCA0107         | T6SS outer tube; vipA                                          | 0.646651164        |
| VC2240          | decarboxylase                                                  | 0.641421098        |
| VCA0271         | hypothetical protein                                           | 0.607169032        |
| VCA0933         | cold shock domain-contain protein; cspV                        | 0.580625454        |
| VC0715          | nitroreductase A                                               | 0.570175745        |
| VCA0281         | integrase, putative                                            | 0.568173608        |
| VCA0248         | putative L-ascorbate 6-phosphate lactonase                     | 0.544823691        |
| VC2296          | bolA protein                                                   | 0.509163114        |
| VC0092          | LexA repressor                                                 | 0.508418256        |
| VC2735          | hypothetical protein                                           | 0.500998747        |
| VC2664          | chaperonin GroEL                                               | 0.455176759        |
| VC2675          | ATP-dependent protease peptidase subunit; HslV                 | 0.443346247        |
| VC0945          | hypothetical protein                                           | 0.437054759        |
| VCA0752         | thioredoxin 2                                                  | 0.410689113        |
| VCA0020         | T6SS pore forming cargo effector; vasX                         | 0.385393411        |
| VC2674          | ATP-dependent protease ATP-binding subunit; HslU               | 0.382376111        |
| VC1585          | catalase                                                       | 0.378509766        |
| VC0985          | heat shock protein 90                                          | 0.372646378        |
| VC1373          | DnaK-related protein                                           | 0.368682857        |
| VCA1060         | 3,4-dihydroxy-2-butanone 4-phosphate synthase<br>ribB          | 0.362447606        |
| VCA0386;VCA0312 | parD3 and parD1 antitoxin hypothetical protein                 | 0.362062904        |
| VCA0116         | T6SS recycling protease; clpV                                  | 0.361890930        |
| VCA0291         | site-specific recombinase IntI4                                | 0.358570534        |
| VCA0112         | T6SS hypothetical protein; predicted membrane<br>complex; vasC | 0.356863976        |
| VC0856          | dnaJ protein                                                   | 0.328421535        |
| VC2197          | flagellar hook protein; FlgE                                   | 0.326331303        |

|         |                                                                                      |             |
|---------|--------------------------------------------------------------------------------------|-------------|
| VC0711  | clpB protein                                                                         | 0.309919798 |
|         | bifunctional                                                                         |             |
| VC0276  | phosphoribosylaminoimidazolecarboxamide<br>formyltransferase/IMP cyclohydrolase purH | 0.307131082 |
| VCA0197 | guanosine 5'-monophosphate oxidoreductase                                            | 0.305691639 |
| VCA0114 | T6SS membrane complex protein; vasD                                                  | 0.304550272 |
| VCA0110 | T6SS baseplate protein; vasA                                                         | 0.294662915 |
| VC0188  | oligopeptidase A                                                                     | 0.285309334 |
| VC0854  | heat shock protein; GrpE                                                             | 0.273338759 |
| VC0424  | hypothetical protein                                                                 | 0.261236140 |
| VC0556  | glutamate--cysteine ligase                                                           | 0.259535497 |
|         | phosphoribosylaminoimidazole carboxylase<br>catalytic subunit                        |             |
| VC0052  |                                                                                      | 0.258014281 |
| VC0855  | molecular chaperone DnaK                                                             | 0.253726052 |
| VC0342  | iron-sulfur cluster-binding protein                                                  | 0.232818107 |
| VC0477  | phosphoglycerate kinase pgk                                                          | 0.232540797 |
| VC2044  | hypothetical protein                                                                 | 0.215146647 |
| VC2389  | carbamoyl phosphate synthase large subunit carB                                      | 0.209713917 |
| VCA0005 | hypothetical protein                                                                 | 0.208643919 |
| VC1077  | hypothetical protein                                                                 | 0.207402191 |
| VC0275  | phosphoribosylamine--glycine ligase                                                  | 0.203069308 |
| VCA0120 | T6SS membrane complex protein; vasK                                                  | 0.202494032 |
|         | phosphoribosylaminoimidazole carboxylase<br>ATPase subunit                           |             |
| VC0051  |                                                                                      | 0.194501306 |
| VC0543  | recombinase A                                                                        | 0.193190268 |
| VCA0637 | dihydropteridine reductase                                                           | 0.188420276 |
|         | 3-hydroxydecanoyl-(acyl carrier protein)<br>dehydratase                              |             |
| VC1483  |                                                                                      | 0.185845292 |
| VC0186  | glutathione reductase                                                                | 0.177990329 |
| VC0374  | glucose-6-phosphate isomerase; pgi                                                   | 0.177020508 |
| VC2751  | adenosine deaminase                                                                  | 0.176349793 |
| VC2670  | triosephosphate isomerase; tpiA                                                      | 0.171415676 |
| VC2394  | preprotein translocase subunit; SecA                                                 | 0.144433991 |
|         | tRNA uridine 5-carboxymethylaminomethyl<br>modification enzyme; GidA                 |             |
| VC2775  |                                                                                      | 0.140049843 |
| VC2764  | F0F1 ATP synthase subunit beta                                                       | 0.137417904 |
| VC2720  | putative DNA uptake protein                                                          | 0.137019093 |
| VCA0013 | maltodextrin phosphorylase                                                           | 0.133502567 |
| glyA    | serine hydroxymethyltransferase                                                      | 0.130214809 |
|         | 4-hydroxy-3-methylbut-2-enyl diphosphate<br>reductase                                |             |
| ispH    |                                                                                      | 0.129959770 |
| VC0394  | excinuclease ABC subunit A ; uvrA                                                    | 0.123902710 |

|        |                                                   |             |
|--------|---------------------------------------------------|-------------|
| VC0521 | O-sialoglycoprotein endopeptidase; gcp            | 0.117857361 |
| VC0223 | ADP-heptose--LPS heptosyltransferase II, putative | 0.117303348 |
| VC2766 | F0F1 ATP synthase subunit alpha                   | 0.112933807 |
| VC2716 | hypothetical protein                              | 0.108732759 |
| VC2660 | elongation factor P                               | 0.104389852 |
| VC1000 | acetyl-CoA carboxylase subunit beta               | 0.099589657 |
| VC0695 | phospho-2-dehydro-3-deoxyheptonate aldolase       | 0.098998883 |
| VC2623 | tryptophanyl-tRNA synthetase                      | 0.098328265 |
| VC0108 | DNA polymerase I                                  | 0.096278320 |
| VC0451 | hypothetical protein                              | 0.093923081 |
| VC0190 | DNA-dependent helicase II; uvrD                   | 0.088613892 |
| VC2765 | F0F1 ATP synthase subunit gamma                   | 0.080352199 |

<sup>a</sup>Proteins significantly enriched in  $\Delta lonA$  relative to WT are shown. Student's t-test using a Benjamini-Hochberg FDR cutoff of 5% was used to identify proteins that were differentially expressed.
