# Supplementary material for: c-di-GMP inhibits LonA-dependent proteolysis of TfoY in Vibrio cholerae
Source: PubMed Central journal article supplement (PMC7371385; doi:10.1371/journal.pgen.1008897), 2020-06-26
Supplement: pgen.1008897.s006.pdf [file pgen.1008897.s006.pdf]

Joshi et al.

**S2 Table. Proteins enriched in WT relative to  $\Delta lonA_a$**

| <b>Gene</b> | <b>Description</b>                                                                       | <b>Fold Change (log2)</b> |
|-------------|------------------------------------------------------------------------------------------|---------------------------|
| VC1920      | ATP-dependent protease LA; LonA                                                          | 2.621082664               |
| VC0620      | peptide ABC transporter, periplasmic peptide-binding protein                             | 0.77313396                |
| VC1403      | methyl-accepting chemotaxis protein                                                      | 0.616571678               |
| VC1523      | hypothetical protein                                                                     | 0.588189086               |
| VC1622      | outer membrane protein, putative                                                         | 0.580670401               |
| VCA0697     | sensory box/GGDEF family protein; cdgD                                                   | 0.542207244               |
| VC1621      | agglutination protein                                                                    | 0.498378366               |
| VC1441      | cytochrome c oxidase, subunit CcoO                                                       | 0.478708832               |
| VC1424      | spermidine/putrescine ABC transporter, periplasmic spermidine/putrescine-binding protein | 0.409029135               |
| VCA0849     | hypothetical protein                                                                     | 0.400282145               |
| VCA0405     | hypothetical protein                                                                     | 0.397481483               |
| VC1692      | trimethylamine-N-oxide reductase                                                         | 0.37527705                |
| VCA0205     | anaerobic C4-dicarboxylate transporter                                                   | 0.365745926               |
| VC2217      | beta-N-acetylhexosaminidase                                                              | 0.362460785               |
| VC0490      | hypothetical protein                                                                     | 0.342823848               |
| VC1425      | spermidine/putrescine ABC transporter, periplasmic spermidine/putrescine-binding protein | 0.340334343               |
| VC0538      | thiosulfate ABC transporter, periplasmic thiosulfate-binding protein                     | 0.300140437               |
| VC0907      | DL-methionine transporter ATP-binding subunit                                            | 0.291273999               |
| VCA0807     | ABC transporter, periplasmic substrate-binding protein                                   | 0.283885768               |
| VC1844      | cytochrome d ubiquinol oxidase, subunit I                                                | 0.266298023               |
| VCA1043     | tagE protein                                                                             | 0.260448366               |
| VC2051      | thiol:disulfide interchange protein DsbE                                                 | 0.249364711               |
| VC0156      | vitamin B12 receptor                                                                     | 0.248729424               |
| VC2259      | sulfate adenylyltransferase subunit 1                                                    | 0.22870666                |
| VC2213      | outer membrane protein OmpA                                                              | 0.213343266               |

|         |                                                                 |             |
|---------|-----------------------------------------------------------------|-------------|
| VCA0585 | glutathione S-transferase, putative                             | 0.212515607 |
| VC1170  | tryptophan synthase subunit beta                                | 0.208670749 |
| VC1680  | peptide ABC transporter, periplasmic<br>peptide-binding protein | 0.201142681 |
| VC0927  | UDP-N-acetyl-D-mannosamine<br>transferase                       | 0.188408013 |
| VC1414  | thermostable carboxypeptidase 1                                 | 0.171369224 |
| VCA0998 | Oye family NADH-dependent flavin<br>oxidoreductase              | 0.16395781  |
| VC0918  | UDP-N-acetyl-D-mannosamine<br>dehydrogenase                     | 0.145839381 |
| VC1769  | DNA methylase HsdM, putative                                    | 0.137020074 |
| VC1021  | LuxO repressor protein                                          | 0.121211053 |
| VC1834  | hypothetical protein                                            | 0.119616623 |
| VC2510  | aspartate carbamoyltransferase catalytic<br>subunit             | 0.110111106 |
| VC1503  | hypothetical protein                                            | 0.109697749 |
| VC1839  | tolQ protein                                                    | 0.089846289 |

<sup>a</sup>Proteins significantly enriched in WT relative to  $\Delta lonA$  are shown. Student's t-test using a Benjamini-Hochberg FDR cutoff of 5% was used to identify proteins that were differentially expressed.
