# Supplementary material for: c-di-GMP inhibits LonA-dependent proteolysis of TfoY in Vibrio cholerae
Source: PubMed Central journal article supplement (PMC7371385; doi:10.1371/journal.pgen.1008897), 2020-06-26
Supplement: pgen.1008897.s008.pdf [file pgen.1008897.s008.pdf]

**S4 Table. Strains and plasmids used in this study.**

| <b>FY#</b> | <b><i>V. cholerae</i> Strains</b>                                        | <b>Resistance</b> | <b>Reference</b>                           |
|------------|--------------------------------------------------------------------------|-------------------|--------------------------------------------|
| FY_1       | <i>Vibrio cholerae</i> O1 El Tor, Smooth A1552 (Wild Type)               | Rif               | Yildiz FH, Dolganov NA, Schoolnik GK. 2001 |
| FY_1053    | $\Delta$ ctxAB                                                           | Rif               | This study                                 |
| FY_11013   | $\Delta$ ctxAB $\Delta$ lonA                                             | Rif               | This study                                 |
| FY_4507    | $\Delta$ lonA                                                            | Rif               | Rogers                                     |
| FY_12974   | lonA(S678A)                                                              | Rif               | This study                                 |
| FY_9789    | $\Delta$ lonA Tn7:: <i>lonA</i>                                          | Rif, Gm           | Rogers                                     |
| FY_12953   | $\Delta$ tfoY                                                            | Rif               | This study                                 |
| FY_7150    | $\Delta$ cdgJ $\Delta$ rocS $\Delta$ lacZ ( $\Delta$ 2PDE)               | Rif, Gm           | This study                                 |
| FY_6347    | $\Delta$ cdgD $\Delta$ cdgH $\Delta$ cdgK $\Delta$ cdgL ( $\Delta$ 4DGC) | Rif, Gm           | This study                                 |
| FY_13650   | $\Delta$ tfoY Tn7:: <i>tfoY</i>                                          | Rif, Gm           | This study                                 |
| FY_12956   | $\Delta$ lonA $\Delta$ tfoY                                              | Rif               | This study                                 |
| FY_13652   | $\Delta$ lonA $\Delta$ tfoY Tn7:: <i>tfoY</i>                            | Rif, Gm           | This study                                 |
| FY_13971   | $\Delta$ lonA $\Delta$ tfoY Tn7:: <i>lonA</i>                            | Rif, Gm           | This study                                 |
| FY_237     | Wild Type Tn7:: <i>gfp</i>                                               | Rif, Gm           | Lim B, Beyhan S, Meir J, Yildiz FH. 2006.  |
| FY_13017   | $\Delta$ tfoY Tn7:: <i>gfp</i>                                           | Rif, Gm           | This study                                 |
| FY_4512    | $\Delta$ lonA Tn7:: <i>gfp</i>                                           | Rif, Gm           | This study                                 |
| FY_13016   | $\Delta$ lonA $\Delta$ tfoY Tn7:: <i>gfp</i>                             | Rif, Gm           | This study                                 |
| FY_14002   | Wild Type Tn7:: <i>ptac-tfoY</i>                                         | Rif, Gm           | This study                                 |
| FY_14006   | $\Delta$ lonA Tn7:: <i>ptac-tfoY</i>                                     | Rif, Gm           | This study                                 |
| FY_14208   | $\Delta$ 2PDE Tn7:: <i>ptac-tfoY</i>                                     | Rif, Gm           | This study                                 |
| FY_14209   | $\Delta$ 4DGC Tn7:: <i>ptac-tfoY</i>                                     | Rif, Gm           | This study                                 |
| FY_15961   | $\Delta$ lonA Tn7:: <i>ptac-tfoY</i>                                     | Rif, Gm           | This study                                 |
| FY_15962   | $\Delta$ lonA $\Delta$ 2PDE Tn7:: <i>ptac-tfoY</i>                       | Rif, Gm           | This study                                 |
| FY_15963   | $\Delta$ lonA $\Delta$ 4DGC Tn7:: <i>ptac-tfoY</i>                       | Rif, Gm           | This study                                 |
| FY_15964   | $\Delta$ tfoY Tn7:: <i>ptac-tfoY</i>                                     | Rif, Gm           | This study                                 |
| FY_15965   | $\Delta$ tfoY $\Delta$ lonA Tn7:: <i>ptac-tfoY</i>                       | Rif, Gm           | This study                                 |
| FY_15966   | $\Delta$ tfoY $\Delta$ 2PDE Tn7:: <i>ptac-tfoY</i>                       | Rif, Gm           | This study                                 |
| FY_15967   | $\Delta$ tfoY $\Delta$ 4DGC Tn7:: <i>ptac-tfoY</i>                       | Rif, Gm           | This study                                 |
| FY_15968   | $\Delta$ tfoY Tn7:: <i>ptac-tfoY</i> pBBR- <i>vipA-lux</i>               | Rif, Gm, Cm       | This study                                 |
| FY_15969   | $\Delta$ tfoY $\Delta$ 2PDE Tn7:: <i>ptac-tfoY</i> pBBR- <i>vipA-lux</i> | Rif, Gm, Cm       | This study                                 |
| FY_15970   | $\Delta$ tfoY $\Delta$ 4DGC Tn7:: <i>ptac-tfoY</i> pBBR- <i>vipA-lux</i> | Rif, Gm, Cm       | This study                                 |
| FY_15971   | $\Delta$ tfoY Tn7:: <i>ptac-tfoY</i> pBBR- <i>hcp2-lux</i>               | Rif, Gm, Cm       | This study                                 |
| FY_15972   | $\Delta$ tfoY $\Delta$ 2PDE Tn7:: <i>ptac-tfoY</i> pBBR- <i>hcp2-lux</i> | Rif, Gm, Cm       | This study                                 |

|          |                                                                        |             |            |
|----------|------------------------------------------------------------------------|-------------|------------|
| FY_15973 | $\Delta tfoY \Delta 4DGC$ Tn7:: <i>ptac-tfoY</i> pBBR- <i>hcp2-lux</i> | Rif, Gm, Cm | This study |
|----------|------------------------------------------------------------------------|-------------|------------|

| FY#        | Plasmid Harboring Strains                                                                                    | Resistance | Reference                                 |
|------------|--------------------------------------------------------------------------------------------------------------|------------|-------------------------------------------|
| pGP704SacB | pGP704 derivative; mob/oriT sacB                                                                             | Amp        | G. Schoolnik                              |
| pFY_5867   | pGP704SacB- $\Delta$ ctxAB                                                                                   | Amp        | This study                                |
| pFY_596    | pGP704SacB- $\Delta$ lonA                                                                                    | Amp        | Rogers et al. 2016                        |
| pFY_5532   | pGP704SacB- $\Delta$ tfoY                                                                                    | Amp        | This study                                |
| pFY_5523   | pGP704SacB-lonA Full Length (For Site Directed Mutagenesis)                                                  | Amp        | This study                                |
| pFY_5517   | pGP704SacB-lonA(S678A)                                                                                       | Amp        | This study                                |
| pFY_720    | pGP704-Tn7                                                                                                   | Amp, Gm    | Lim B, Beyhan S, Meir J, Yildiz FH. 2006. |
| pUX-BF13   | oriR6K helper plasmid, mobil oriT, provides the Tn7 transposition function in trans                          | Amp        | Lim B, Beyhan S, Meir J, Yildiz FH. 2006. |
| pFY_117    | pGP704-Tn7:: <i>gfp</i>                                                                                      | Amp, Gm    | Lim B, Beyhan S, Meir J, Yildiz FH. 2006. |
| pFY_3488   | pGP704-Tn7:: <i>lonA</i>                                                                                     | Amp, Gm    | Rogers et al. 2016                        |
| pFY_5665   | pGP704-Tn7:: <i>tfoY</i> (Contains <i>tfoY</i> open reading frame and 500bp upstream)                        | Amp, Gm    | This study                                |
| pFY_5833   | pGP704-Tn7:: <i>Ptac-tfoY</i>                                                                                | Amp, Gm    | This study                                |
| pFY_4431   | pBBR- <i>hcp2-lux</i> (Contains 300bp upstream of VCA0017 open reading frame as well as 100bp into the gene) | Amp, Cm    | This study                                |
| pFY_4434   | pBBR- <i>vipA-lux</i> (Contains 400bp upstream of VCA0107 open reading frame as well as 100bp into the gene) | Amp, Cm    | This study                                |
